# Supplementary material for: The Antioxidant, Analgesic, Anti-Inflammatory, and Wound Healing Activities of Haplophyllum tuberculatum (Forsskal) A. Juss Aqueous and Ethanolic Extract
Source: MDPI journal article supplement (doi:10.3390/life12101553), 2022-10-06

# = Shimadzu LabSolutions Quant. Browser Data Report =

Acquired by : System Administrator  
 Data Acquired : 10/12/2021 12:01:01  
 Sample Type : Unknown  
 Sample Name : 11  
 Sample ID :  
 Sample Amount : 1  
 Dilution Factor : 1  
 Vial# : 58  
 Injection Volume : 10 uL  
 Data Filename : 11\_014.lcd  
 Method Filename : polifenoli screening SIM.lcm  
 Processed by : System Administrator  
 Modified Date : 10/12/2021 12:01:45

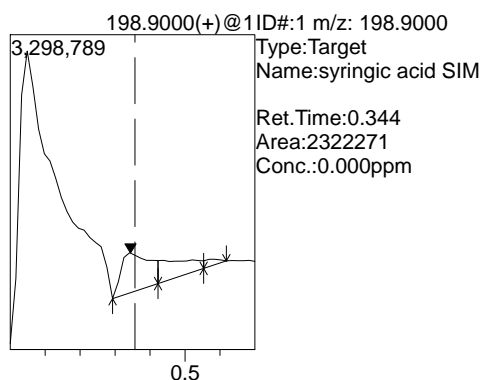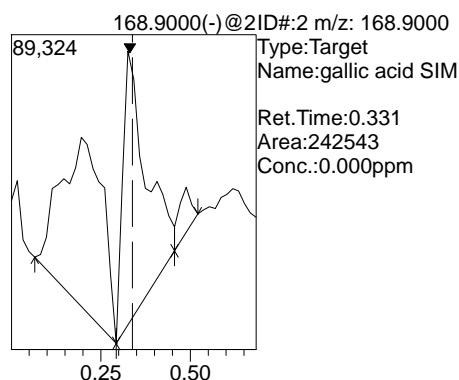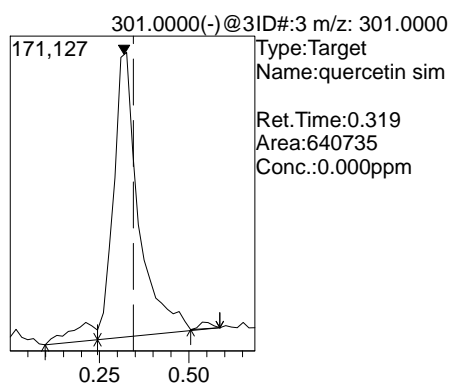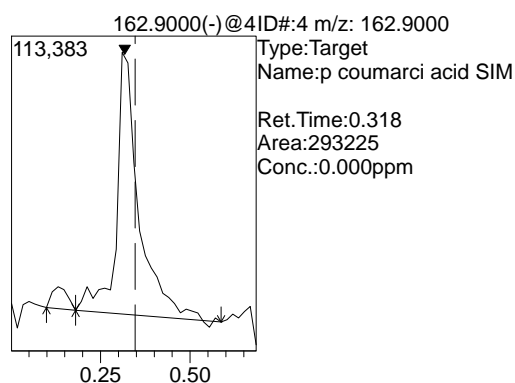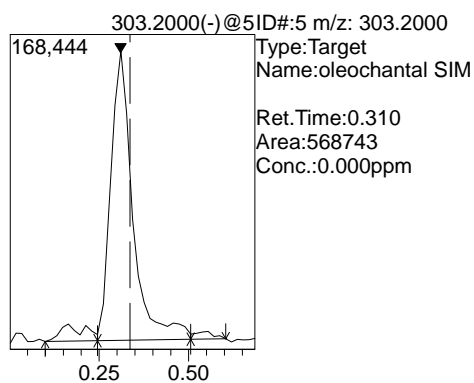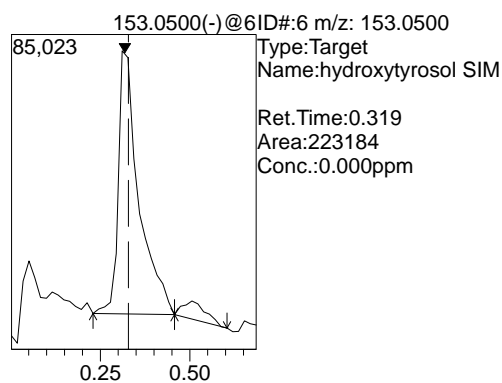

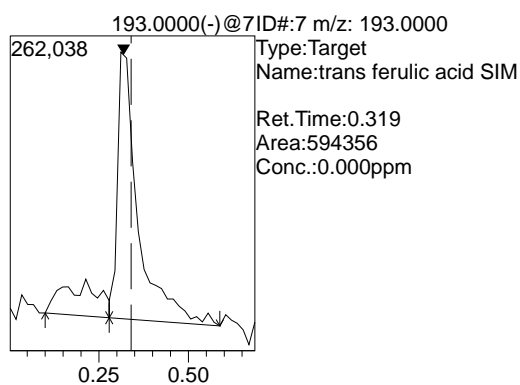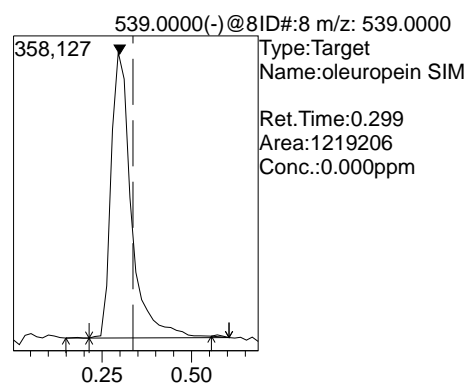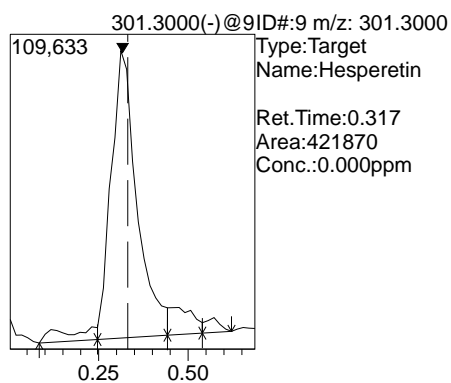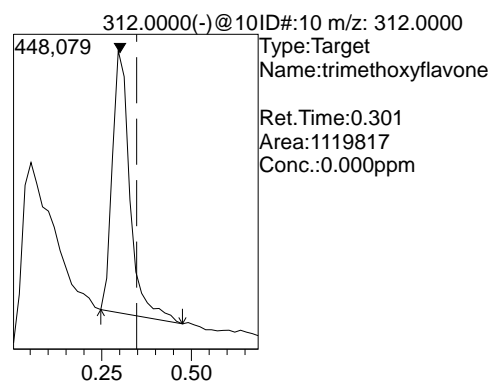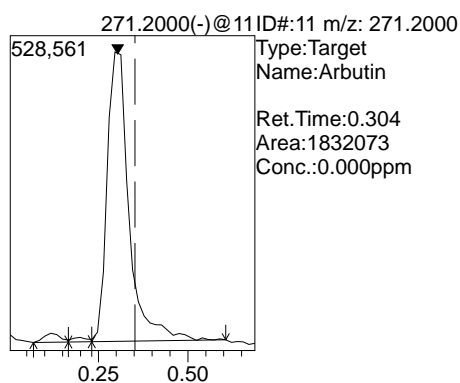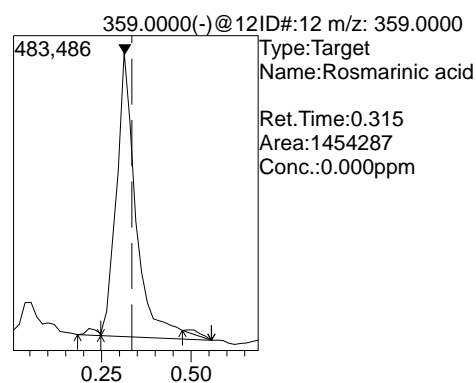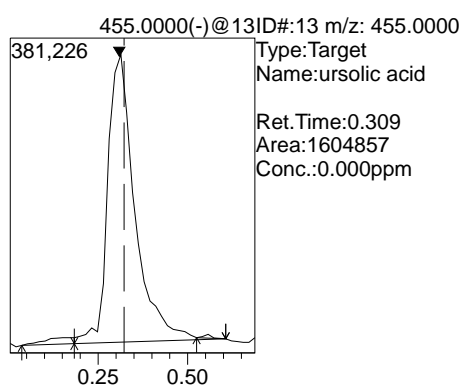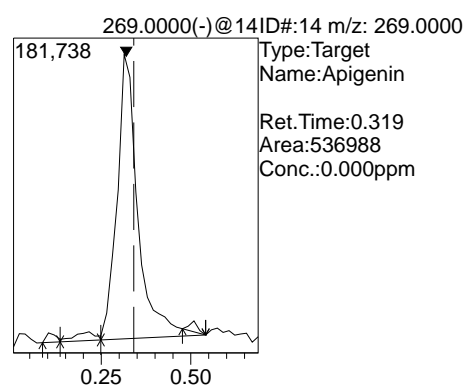

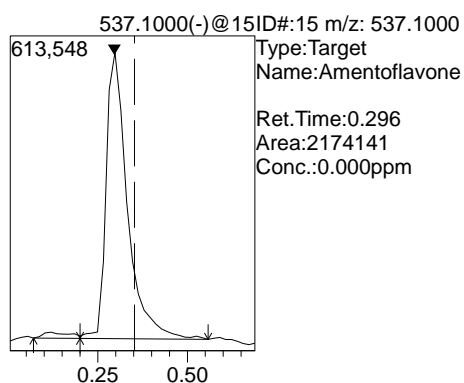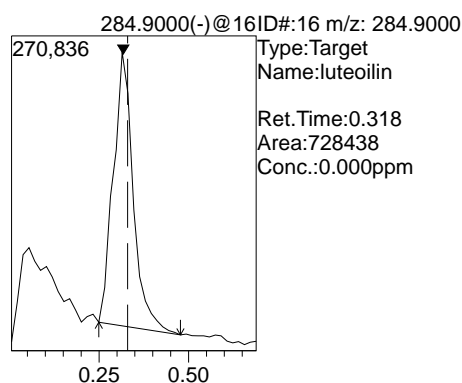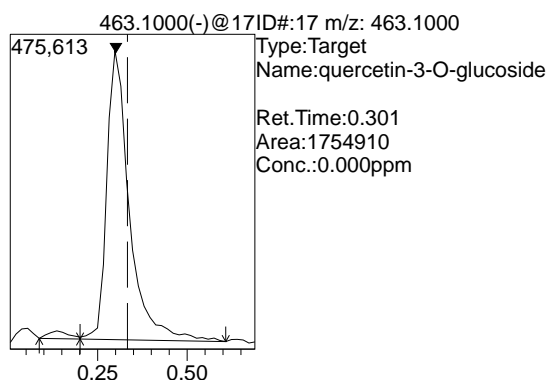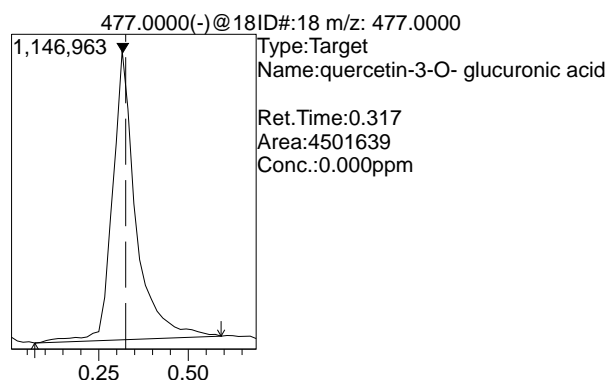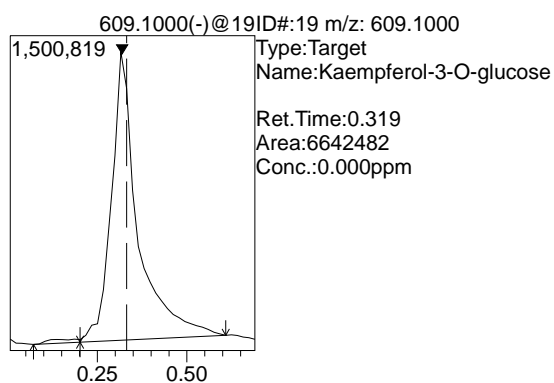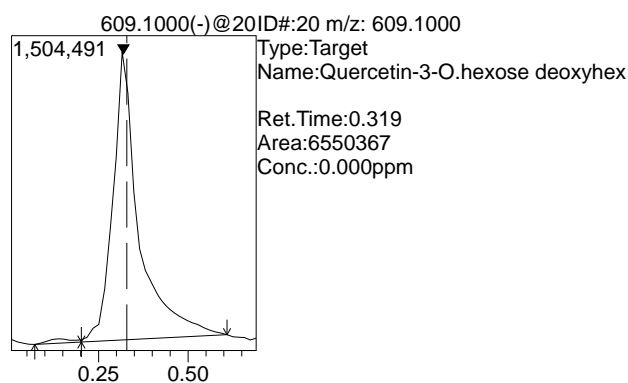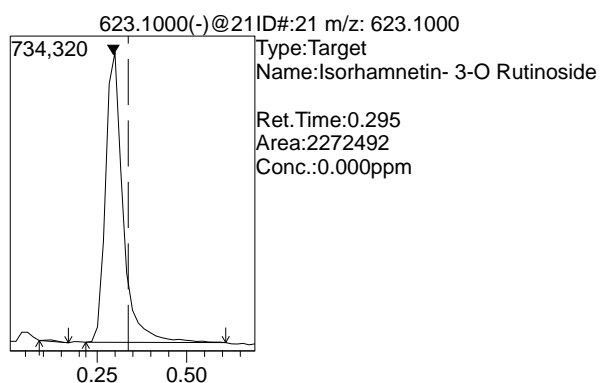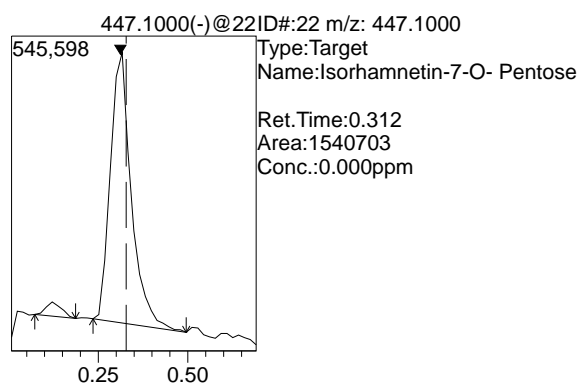

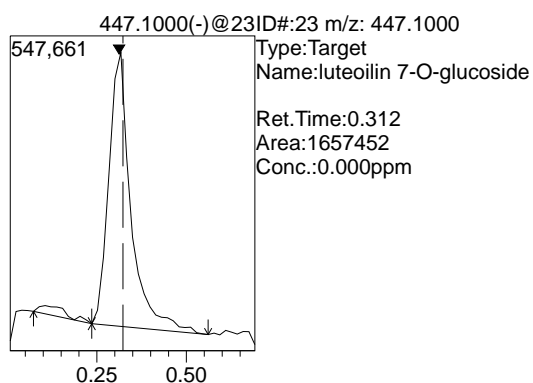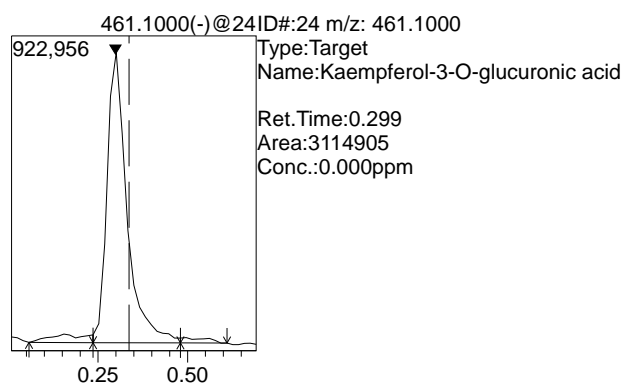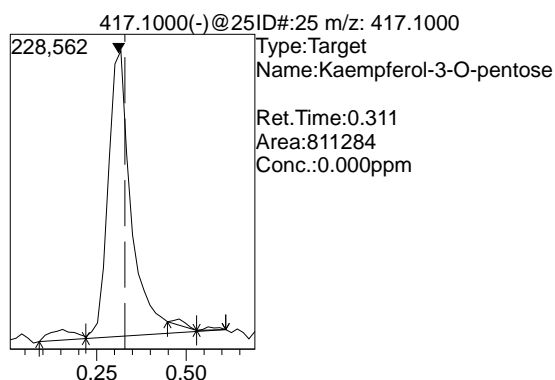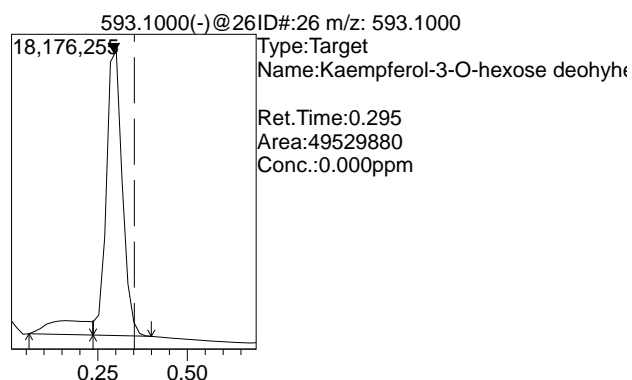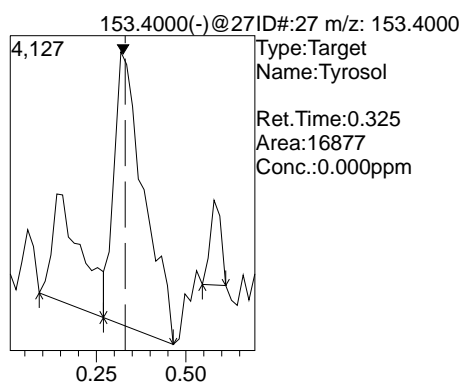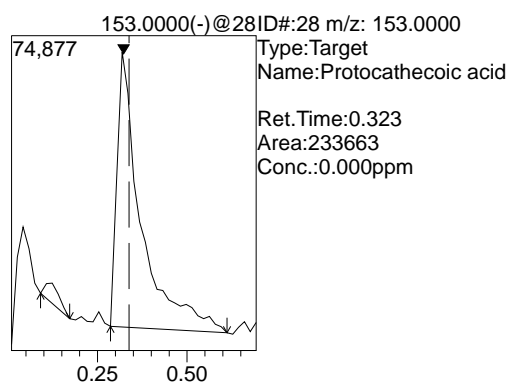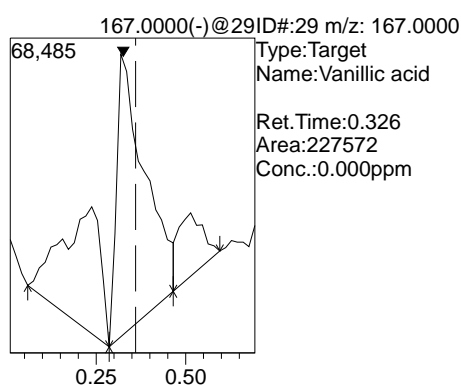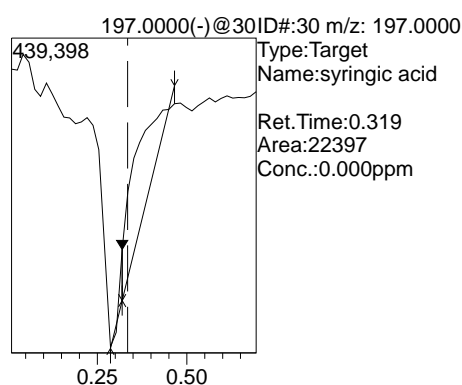

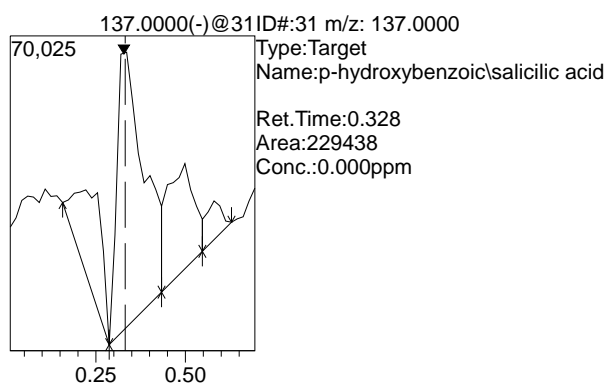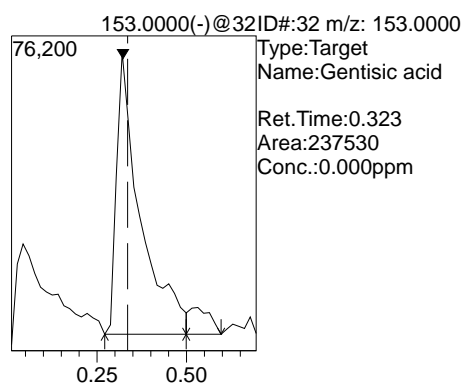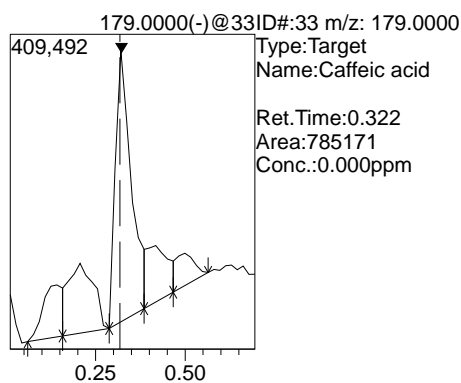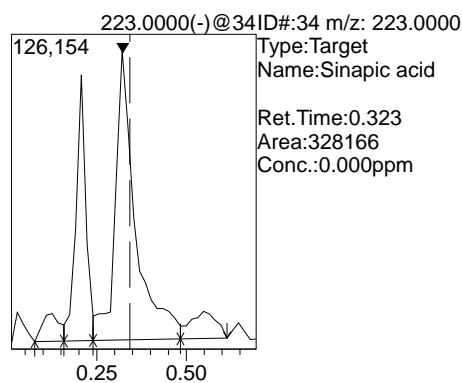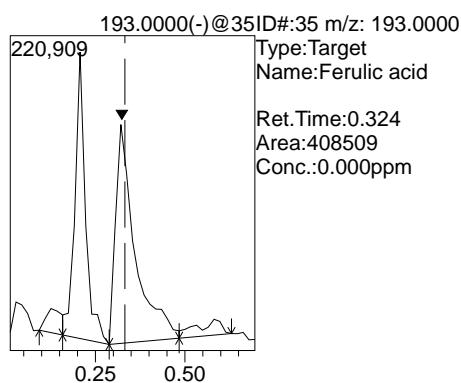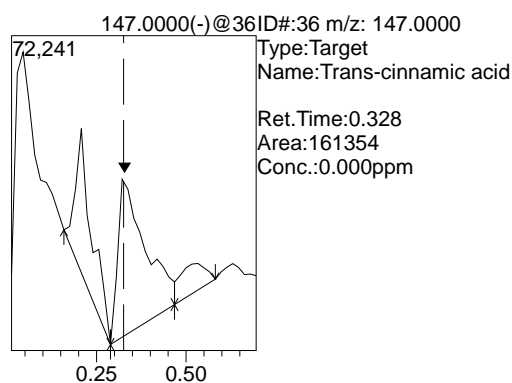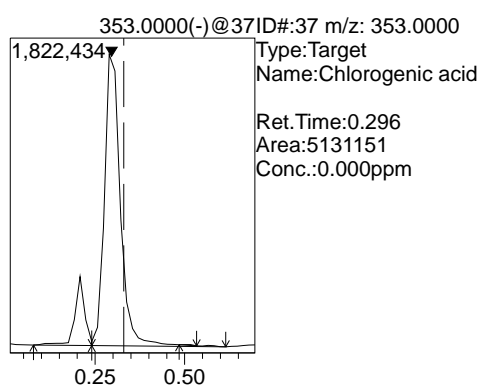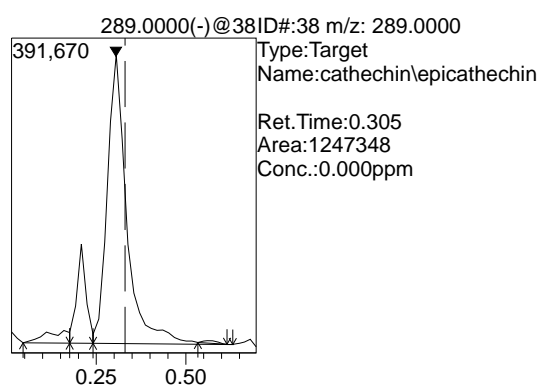

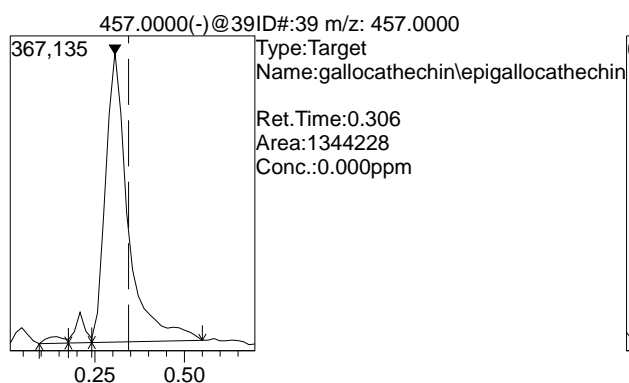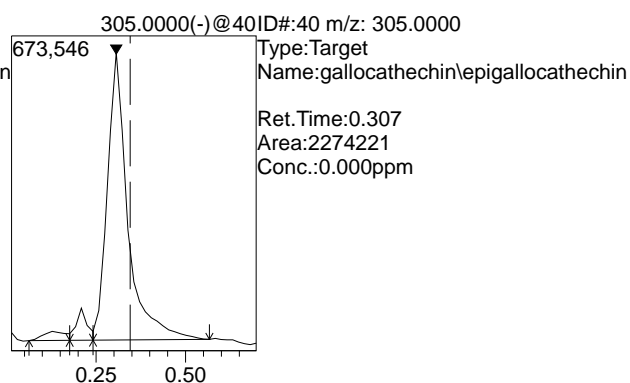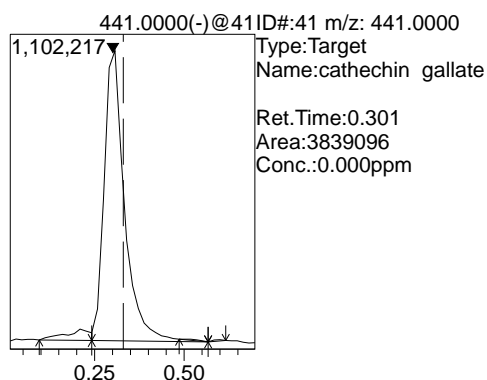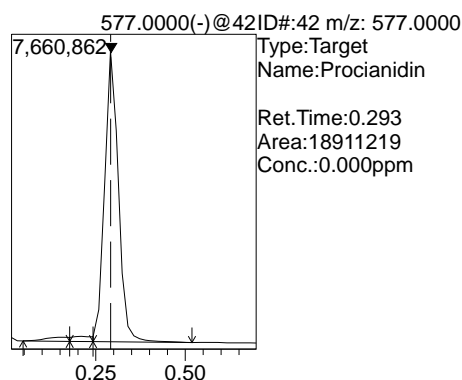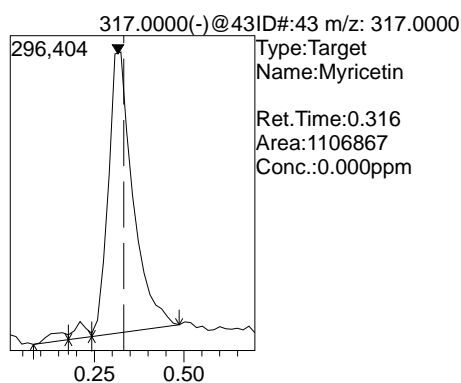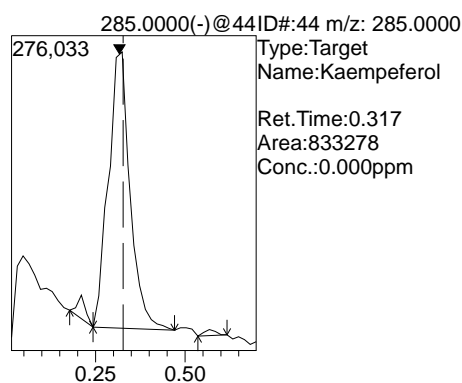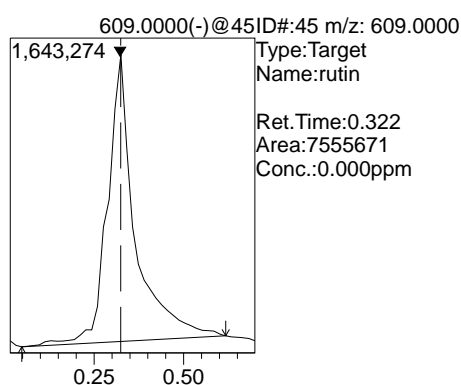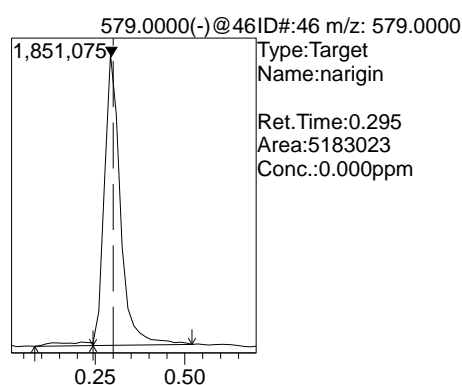

Supplement: s1 [file s1]
